# Supplementary material for: Menura: a code for simulating the interaction between a turbulent solar wind and solar system bodies
Source: Copernicus journal article supplement (doi:10.5194/angeo-2021-64), 2022-01-03

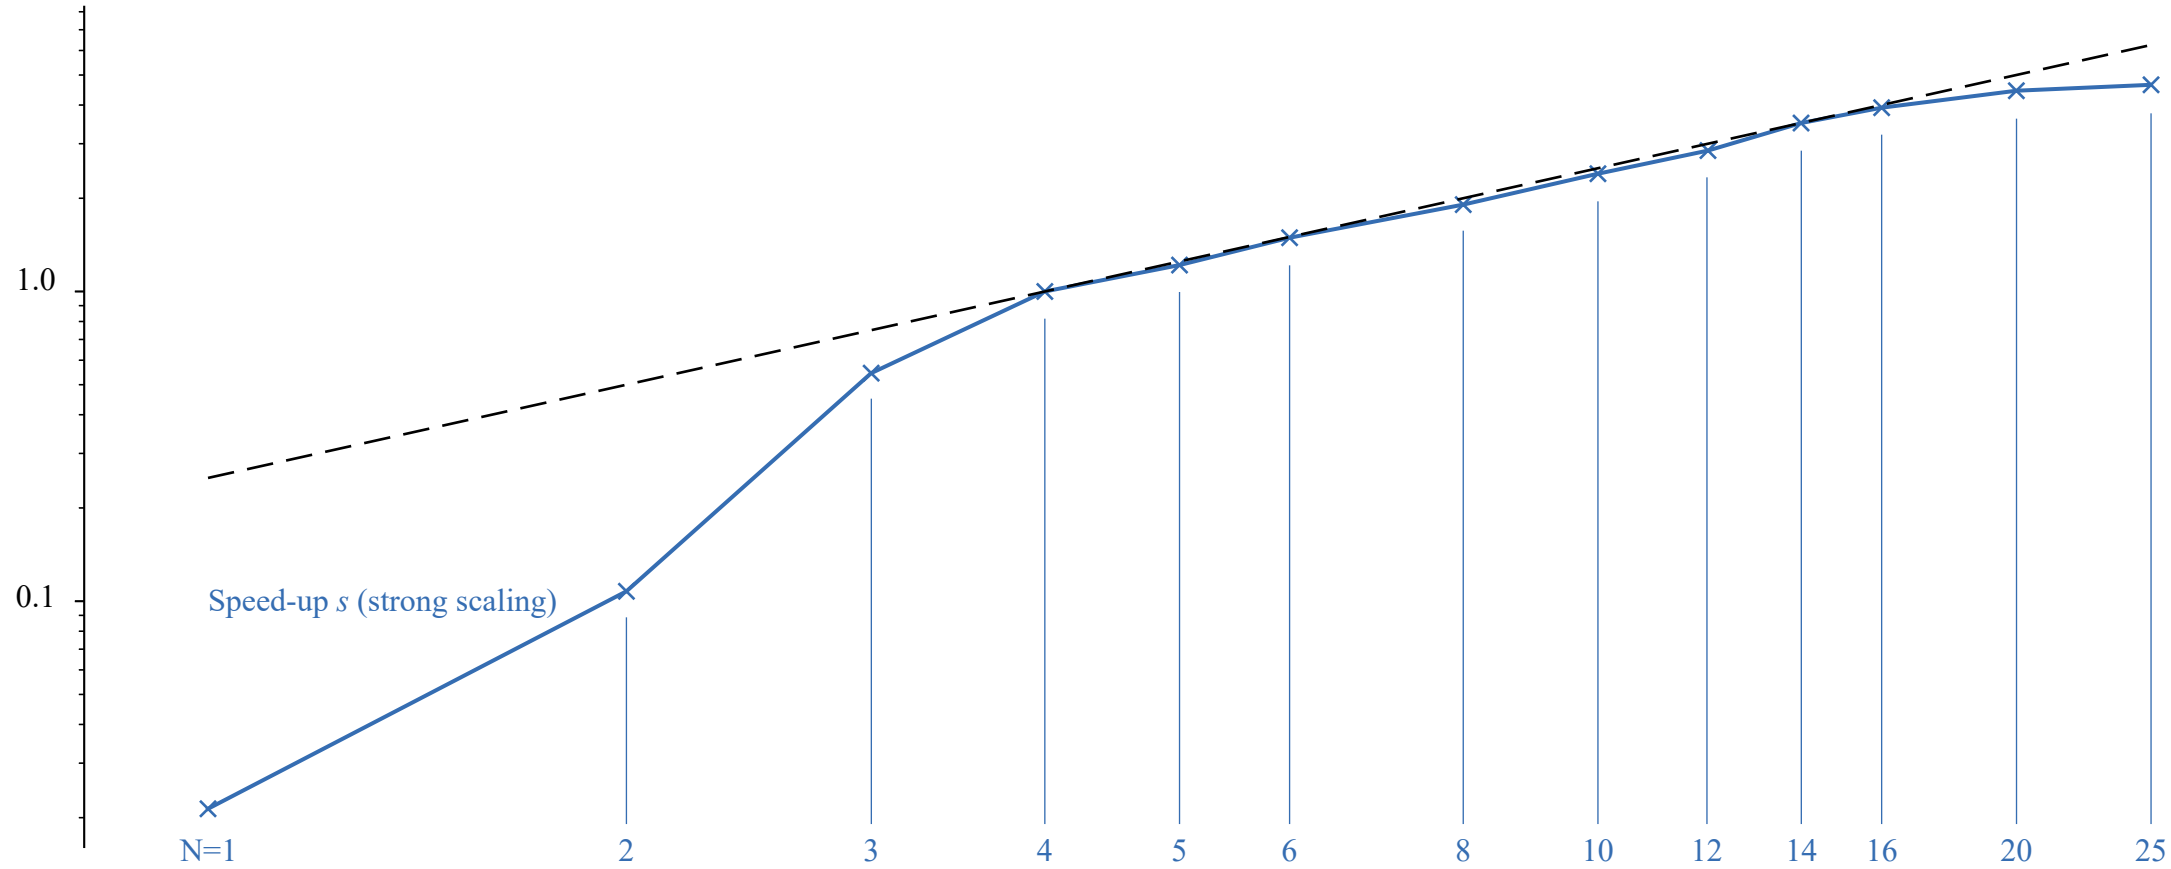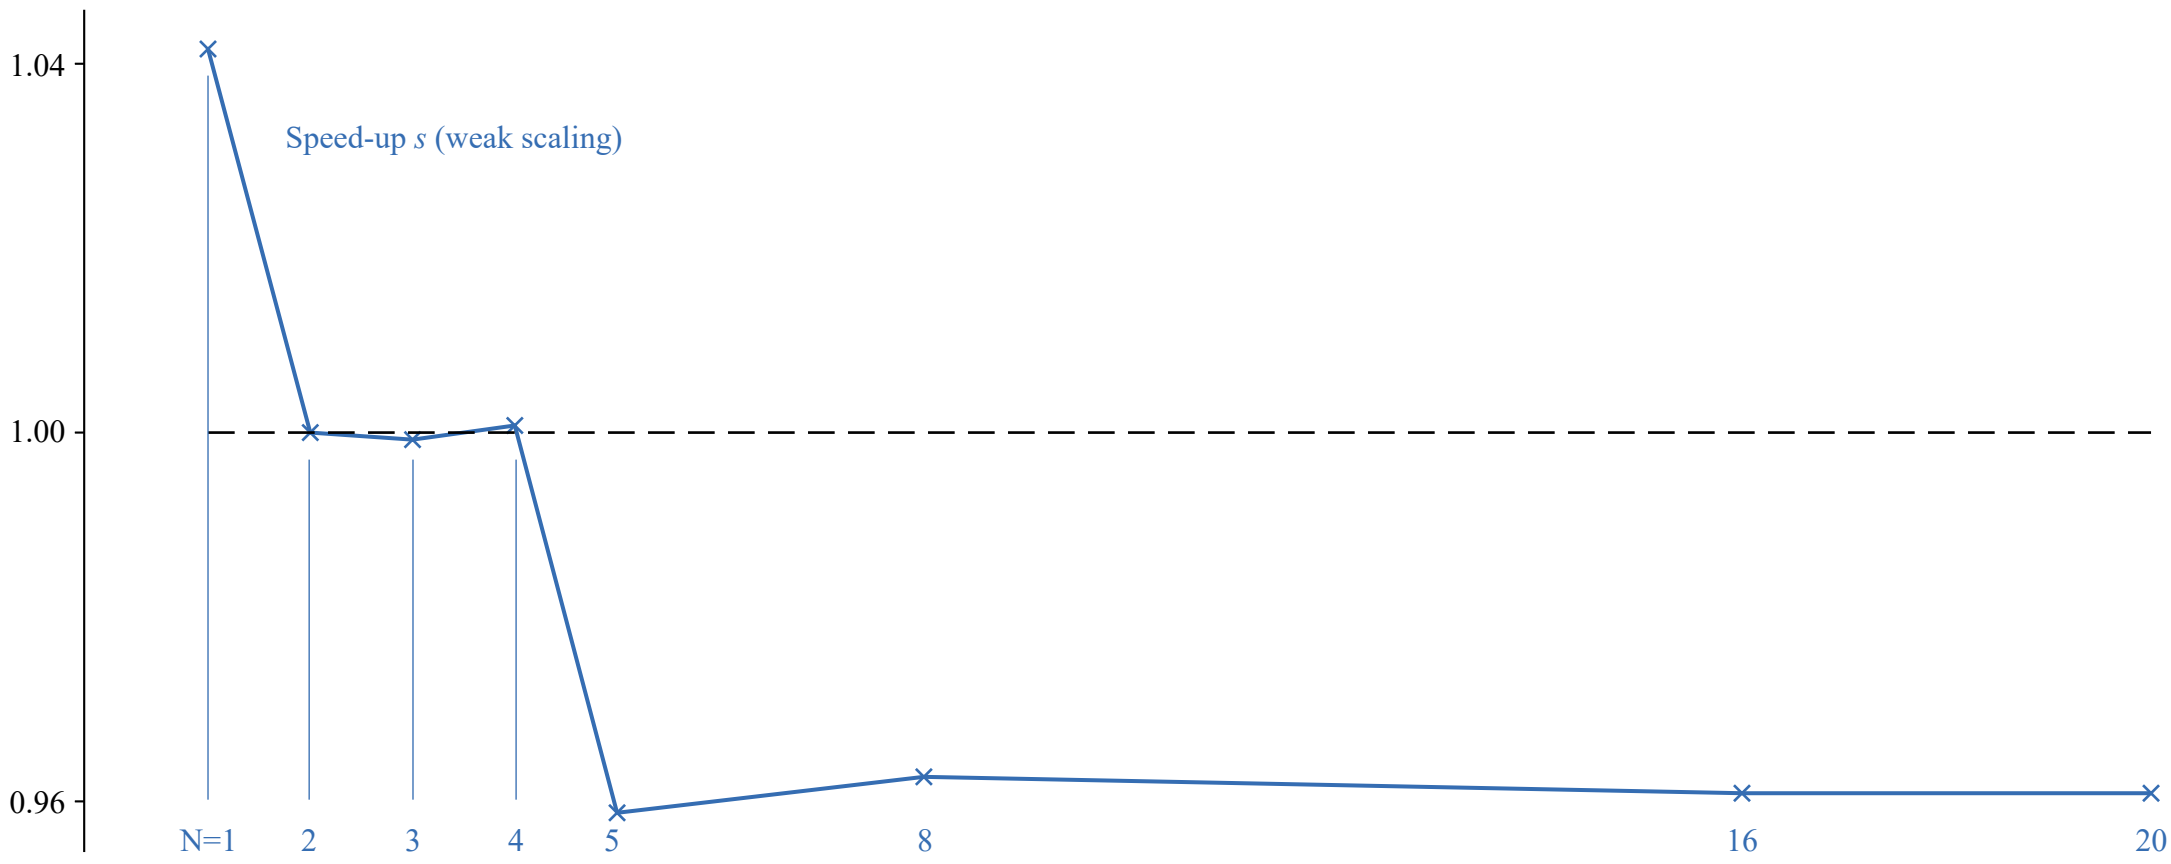

Supplement: Supplementary file [file angeo-2021-64-AC1-supplement.pdf]
